# Supplementary material for: Virtual Reality Meditation Among Youth Experiencing Homelessness: Pilot Randomized Controlled Trial of Feasibility
Source: PubMed Central journal article supplement (PMC7545327; doi:10.2196/18244), 2020-09-24

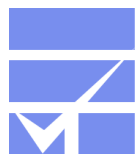

# CONSORT

TRANSPARENT REPORTING of TRIALS

## CONSORT 2010 Diagram

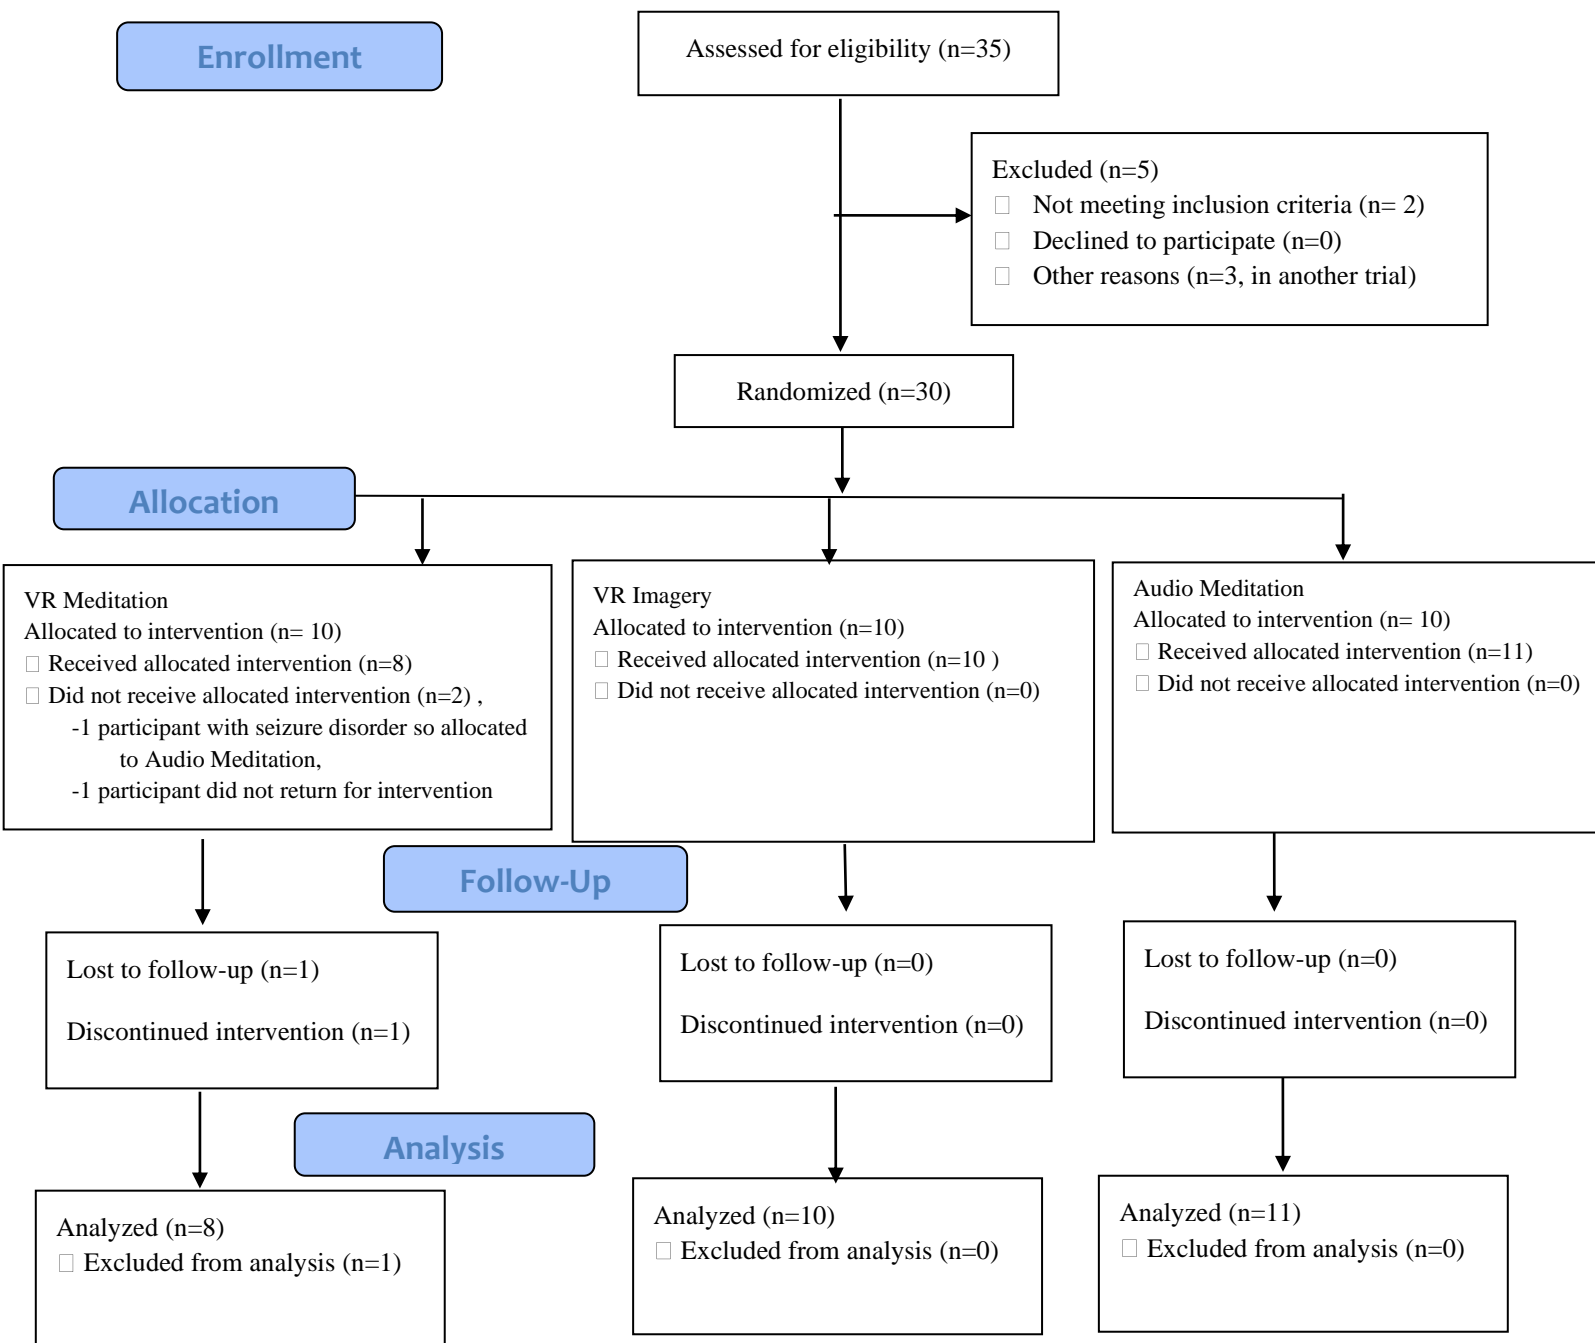

Supplement: mental_v7i9e18244_app2.pdf [file mental_v7i9e18244_app2.pdf]
